# Supplementary material for: Detailed stratified GWAS analysis for severe COVID-19 in four European populations
Source: PubMed Central journal article supplement — Hum Mol Genet. 2022 Jul 15;31(23):3945–66. doi: 10.1093/hmg/ddac158 (PMC9703941; doi:10.1093/hmg/ddac158), 2022-07-15

LZTFL1 chr3:45848457:C:T-(rs35731912)-T\*

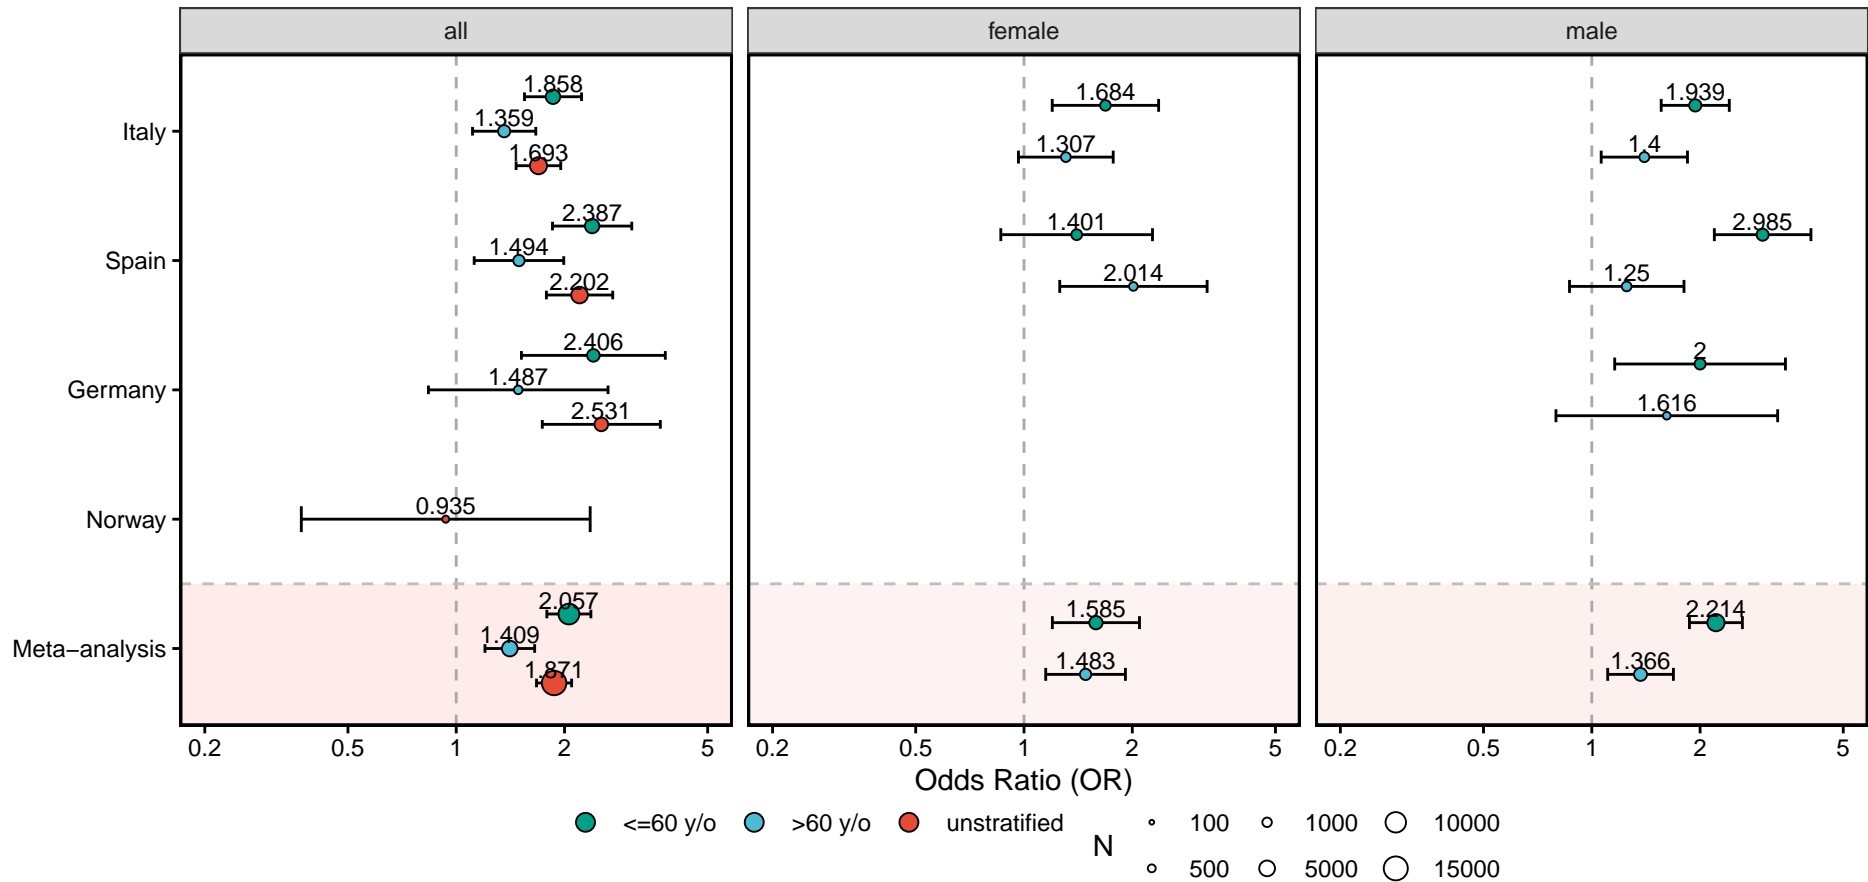

ABO chr9:133261703:A:G-(rs687289)-A\*

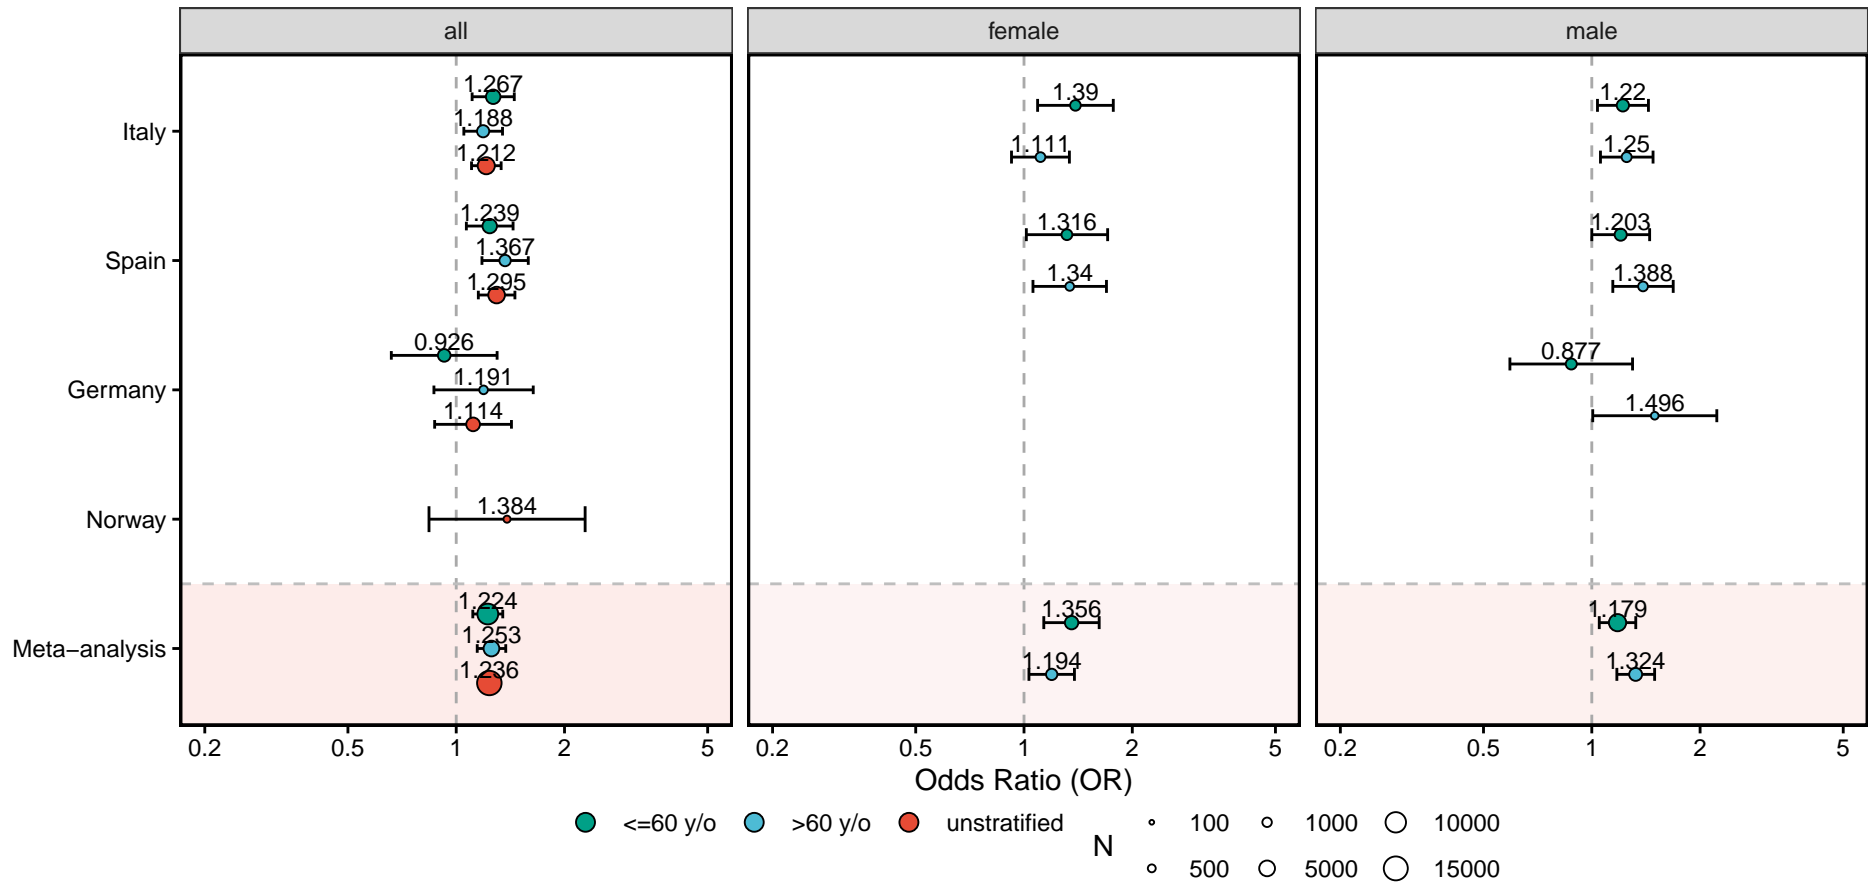

MAPT chr17:45933112:G:A-(rs8065800)-G\*

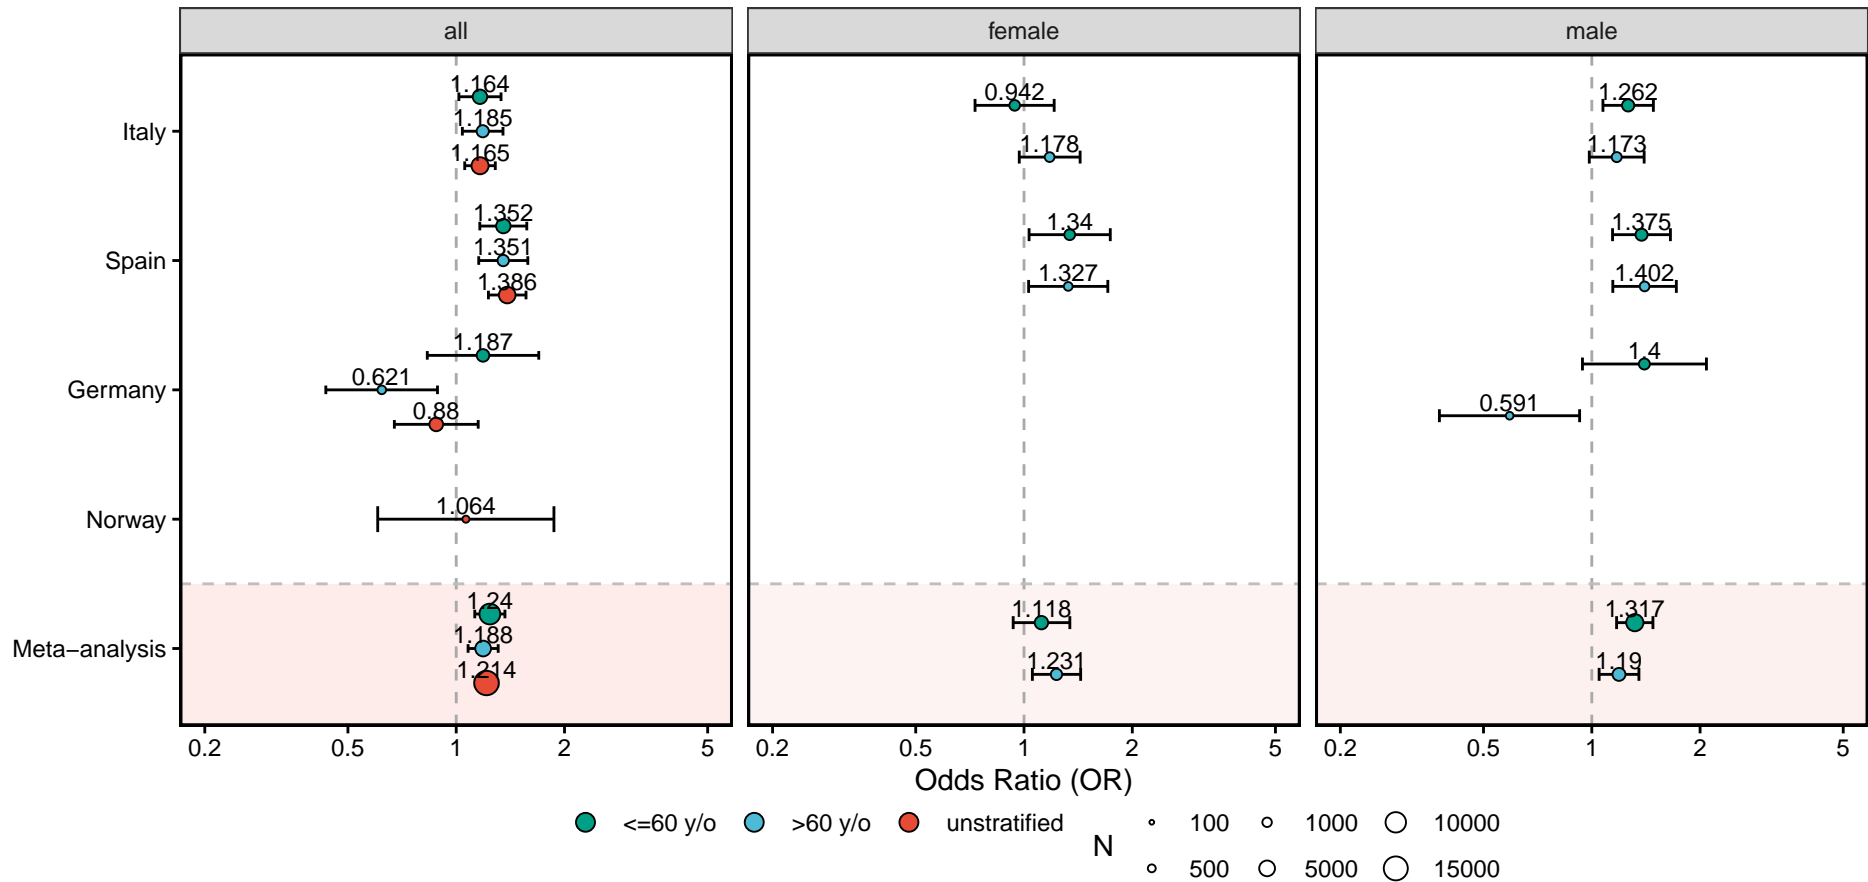

TYK2 chr19:10351837:C:T-(rs11085725)-T\*

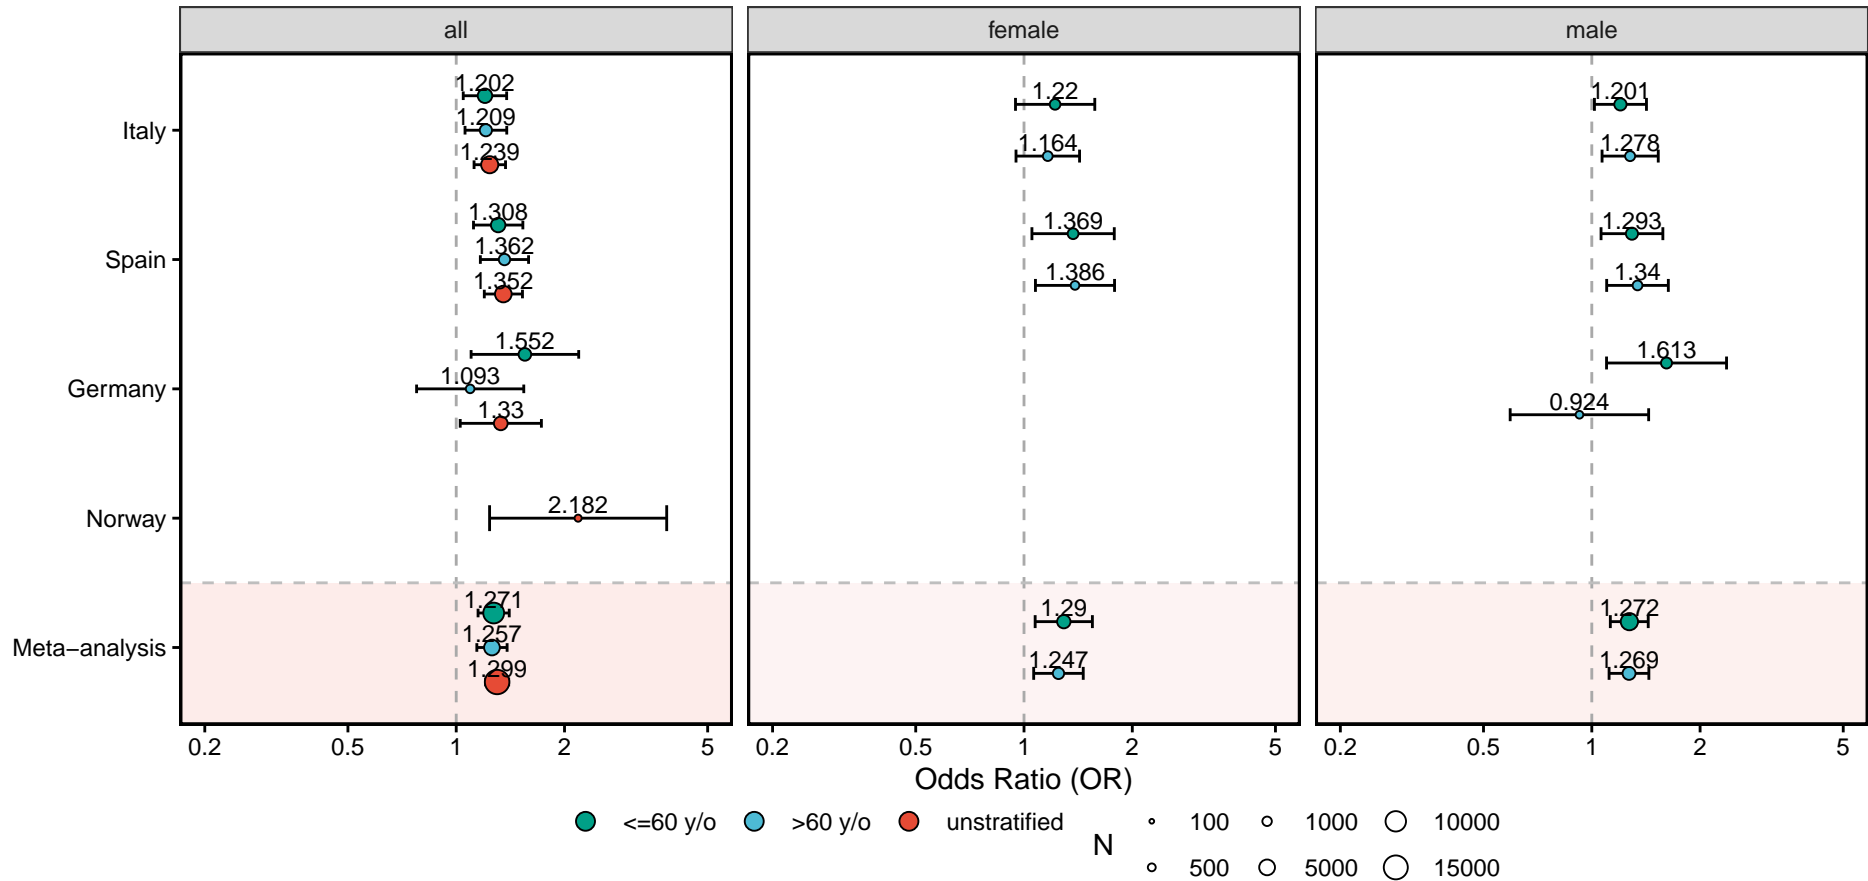

DPP9 chr19:4717660:A:G-(rs12610495)-G\*

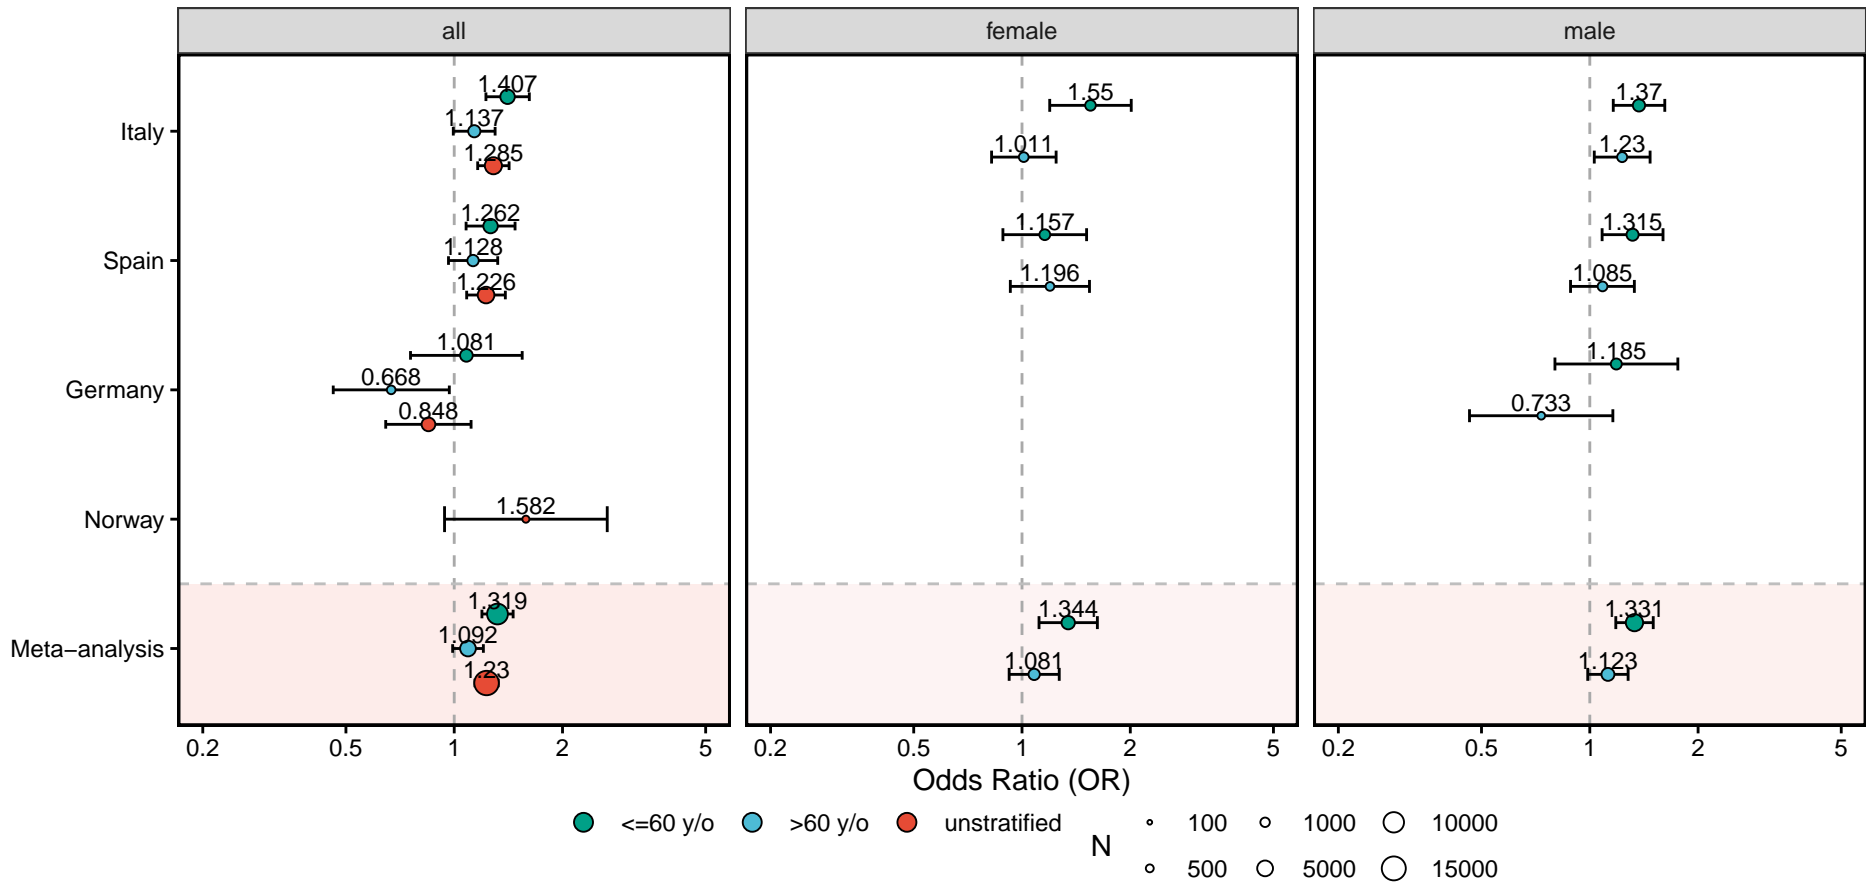

NR1H2 chr19:50379362:T:C-(rs1405655)-C\*

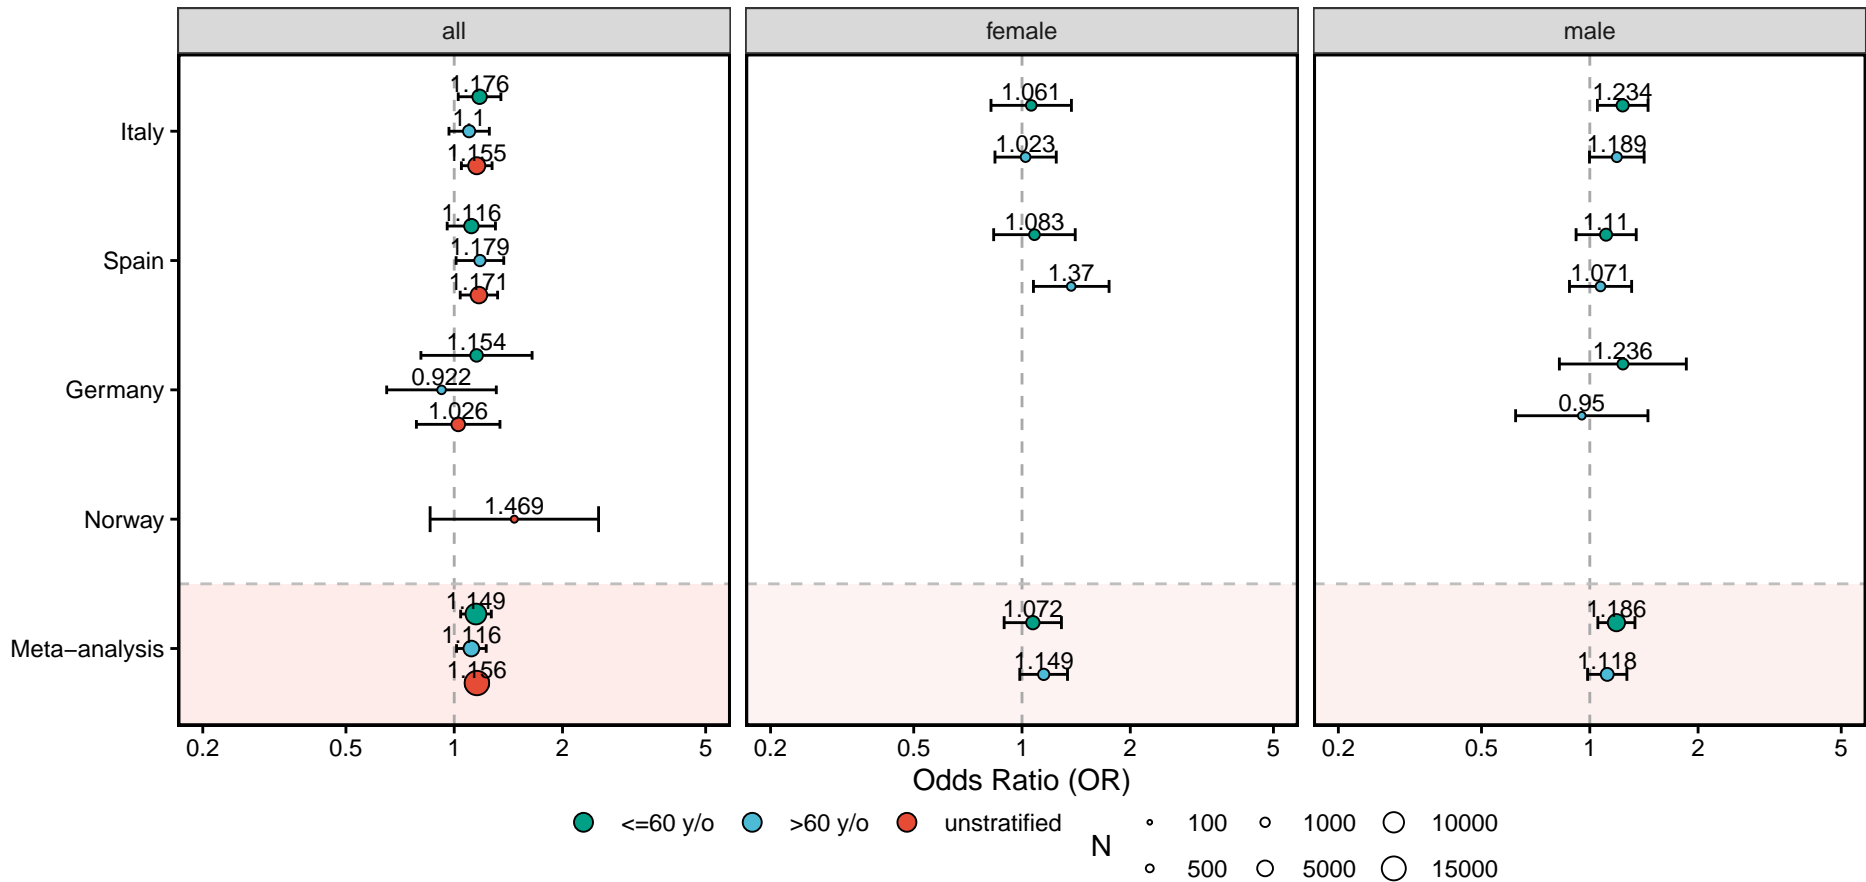

# 17q21 inversion-H2\*

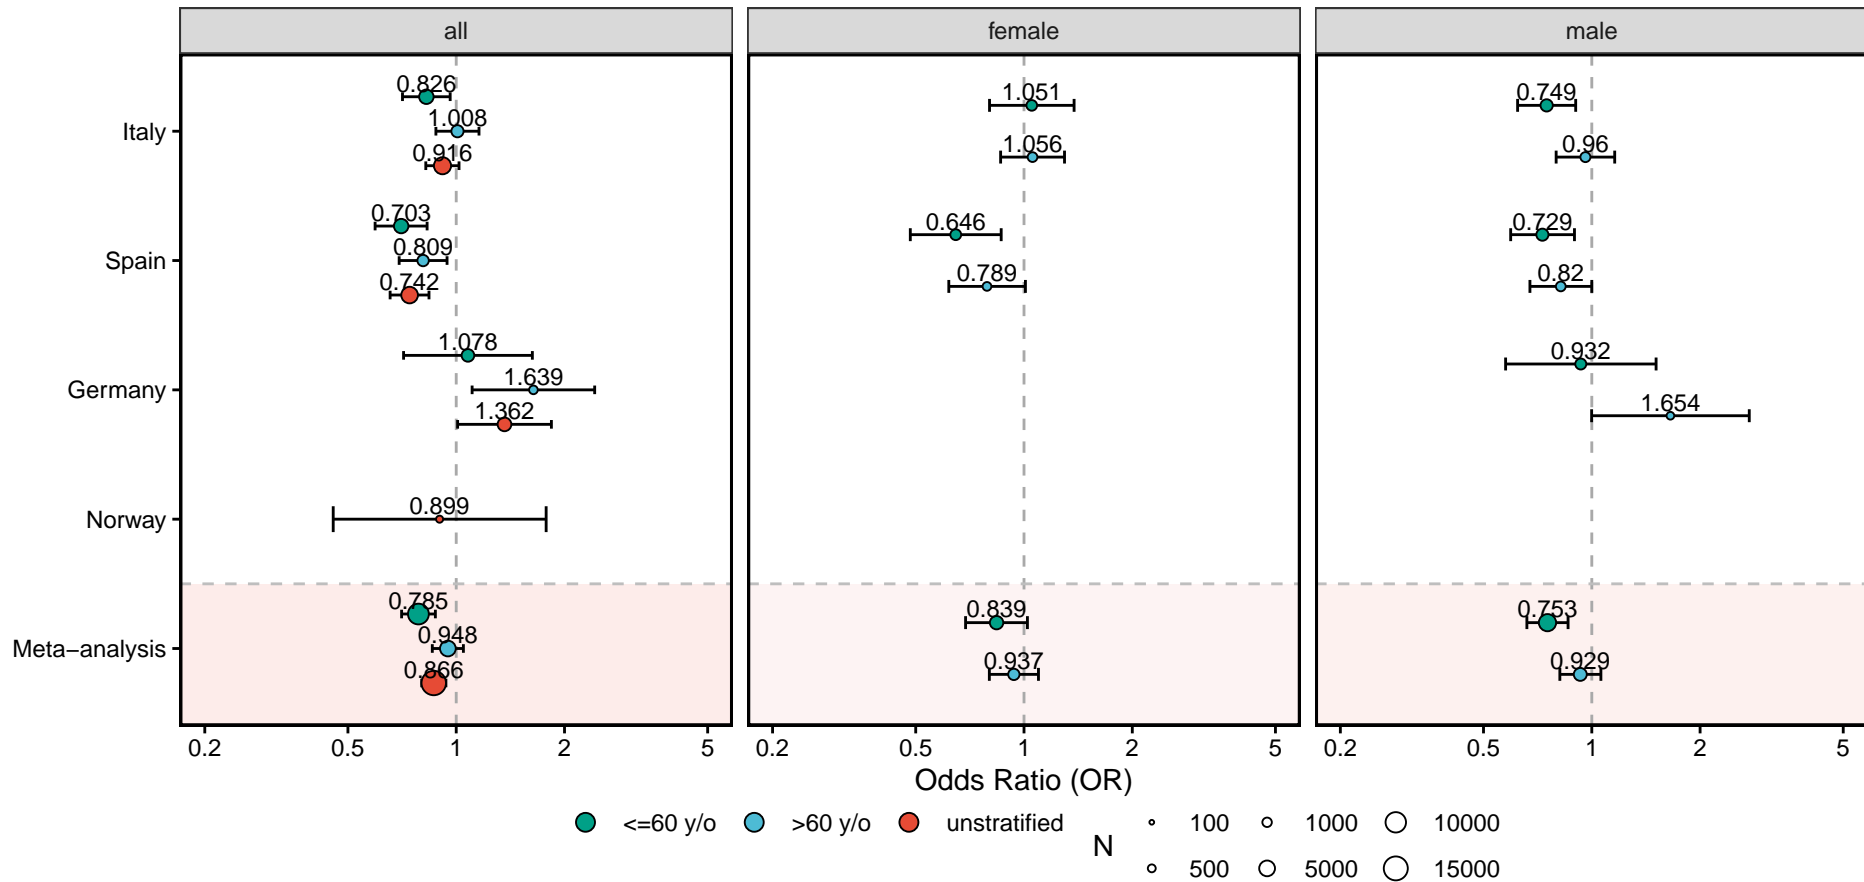

Supplement: supplementary_figure11a_ddac158.pdf [file supplementary_figure11a_ddac158.pdf]
