# Supplementary figures and images for: Detailed stratified GWAS analysis for severe COVID-19 in four European populations
Source: PubMed Central journal article supplement — Hum Mol Genet. 2022 Jul 15;31(23):3945–66. doi: 10.1093/hmg/ddac158 (PMC9703941; doi:10.1093/hmg/ddac158), 2022-07-15

ABO chr9:133271182:T:C-(rs550057)-T\*

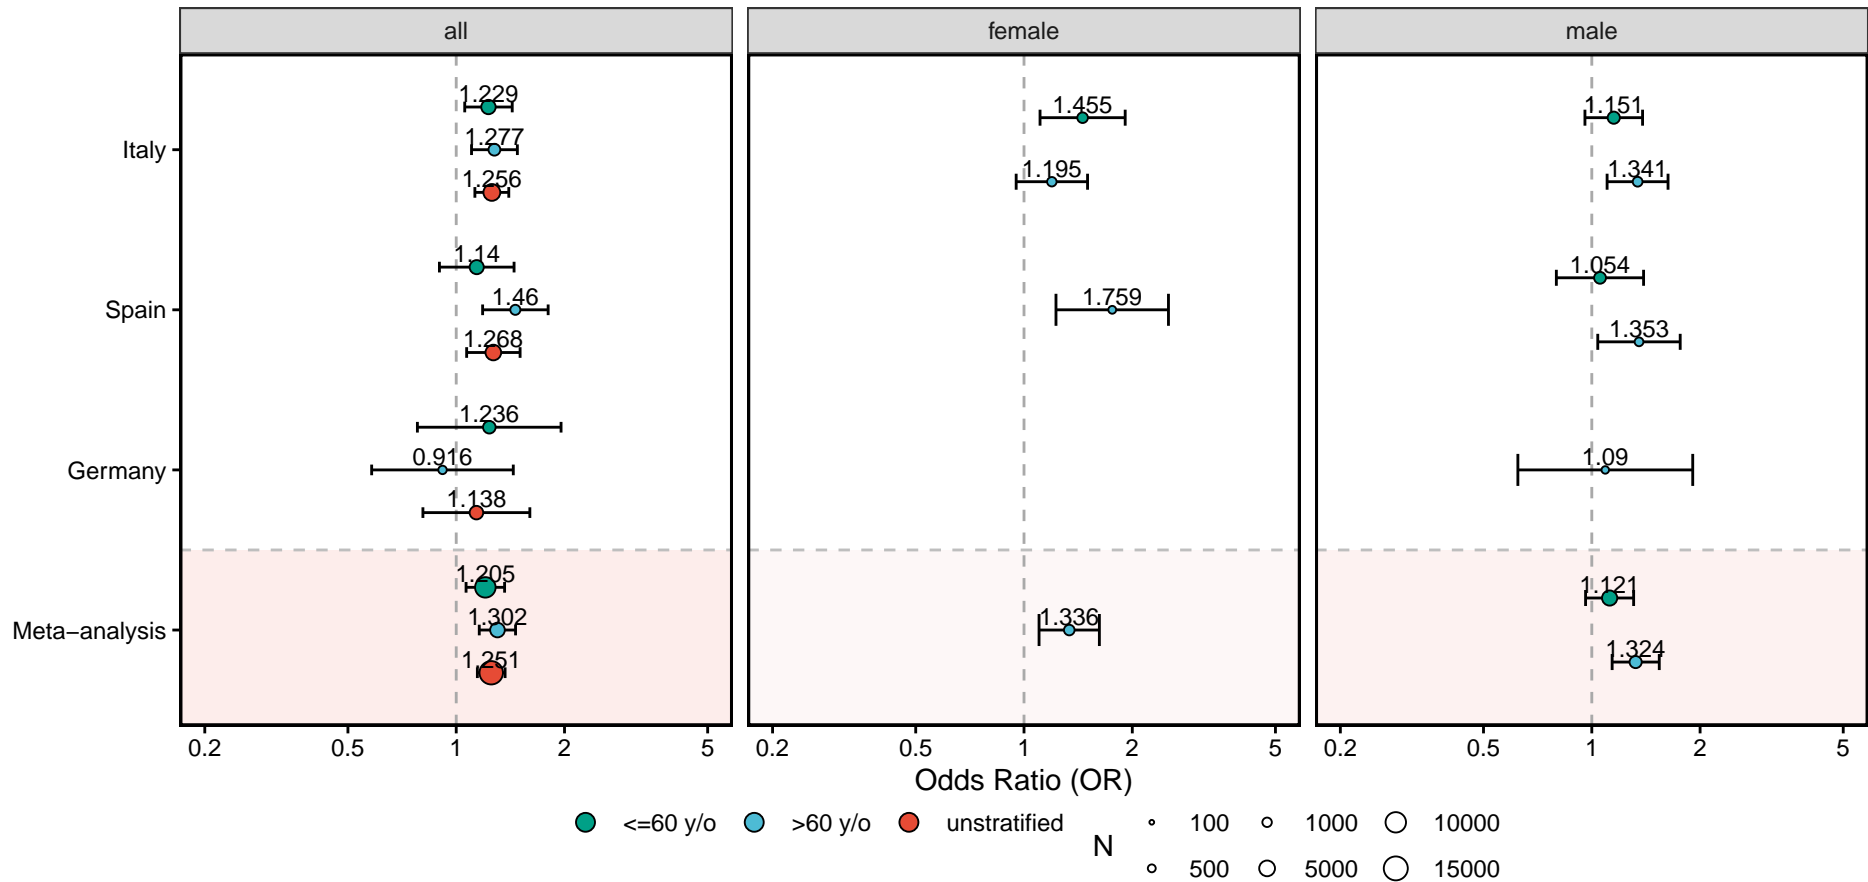

TYK2 chr19:10351837:C:T-(rs11085725)-T\*

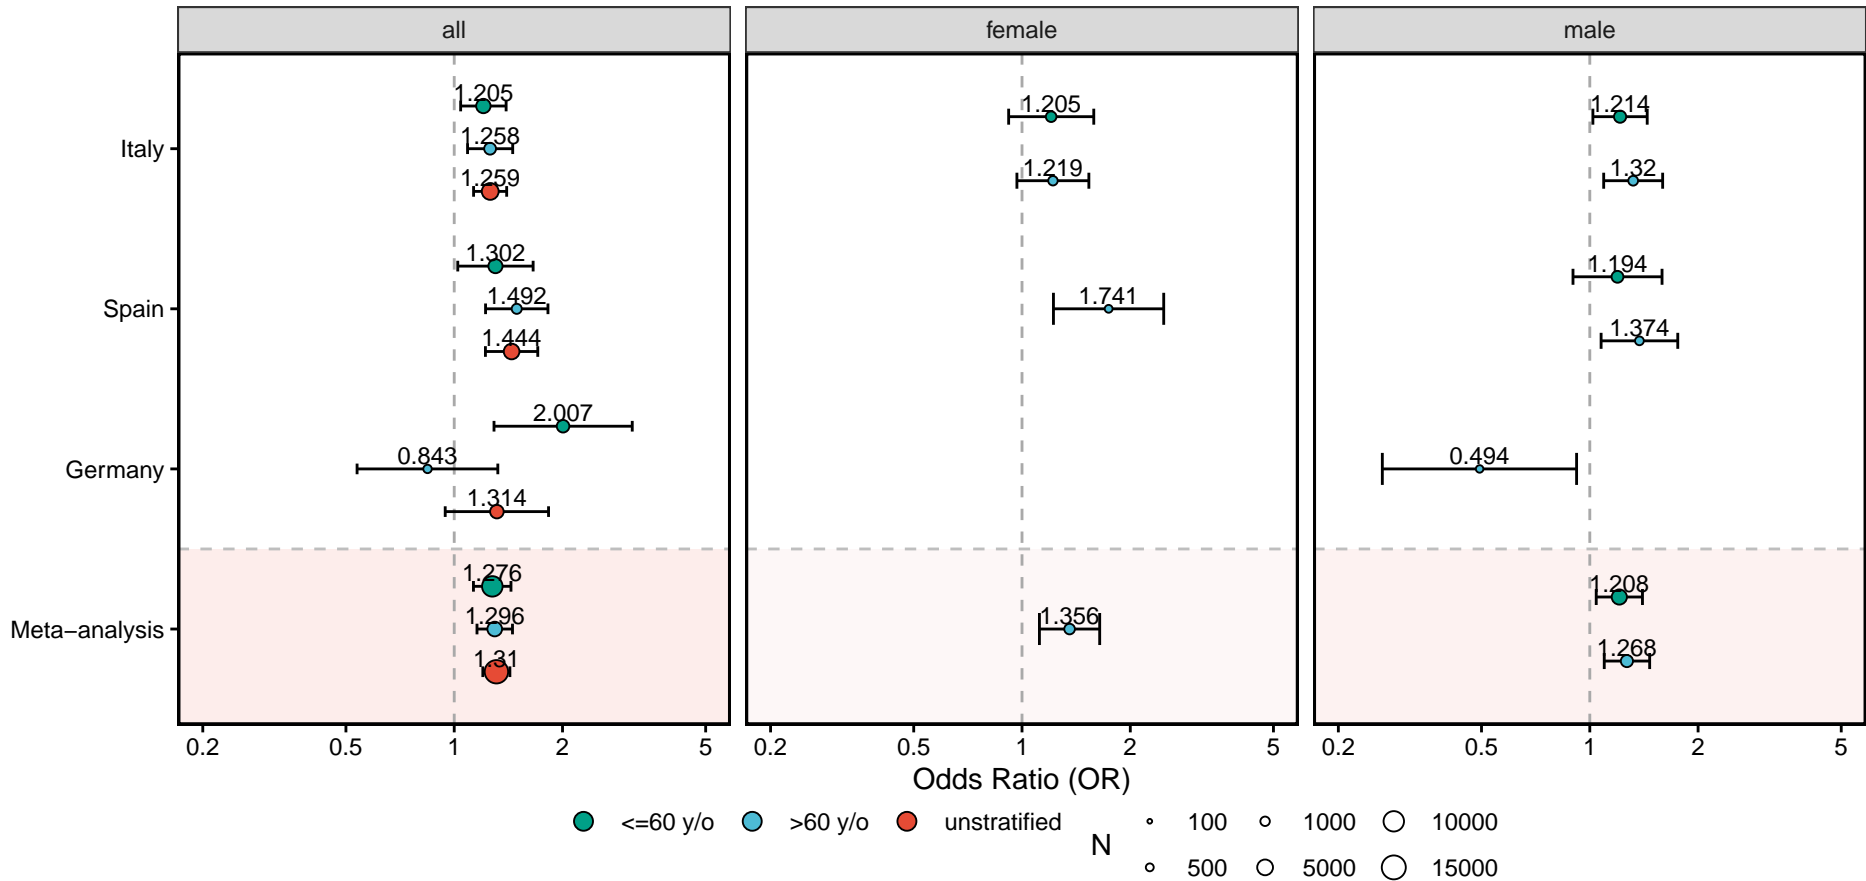

DPP9 chr19:4717660:A:G-(rs12610495)-G\*

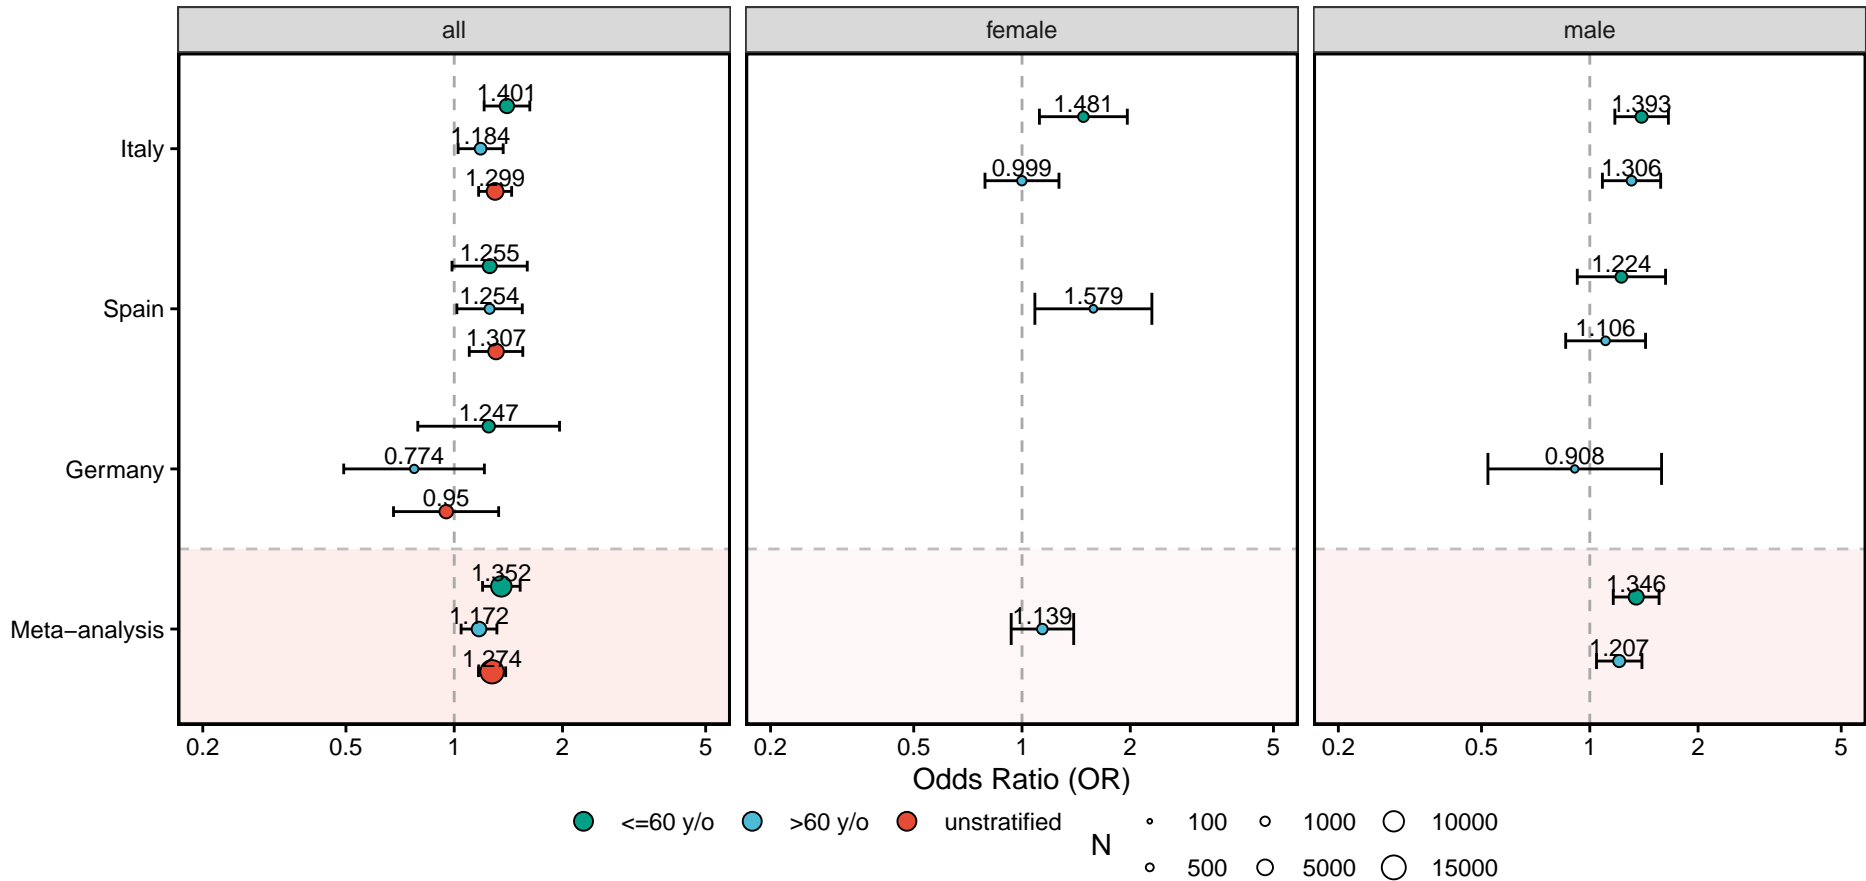

NR1H2 chr19:50379362:T:C-(rs1405655)-C\*

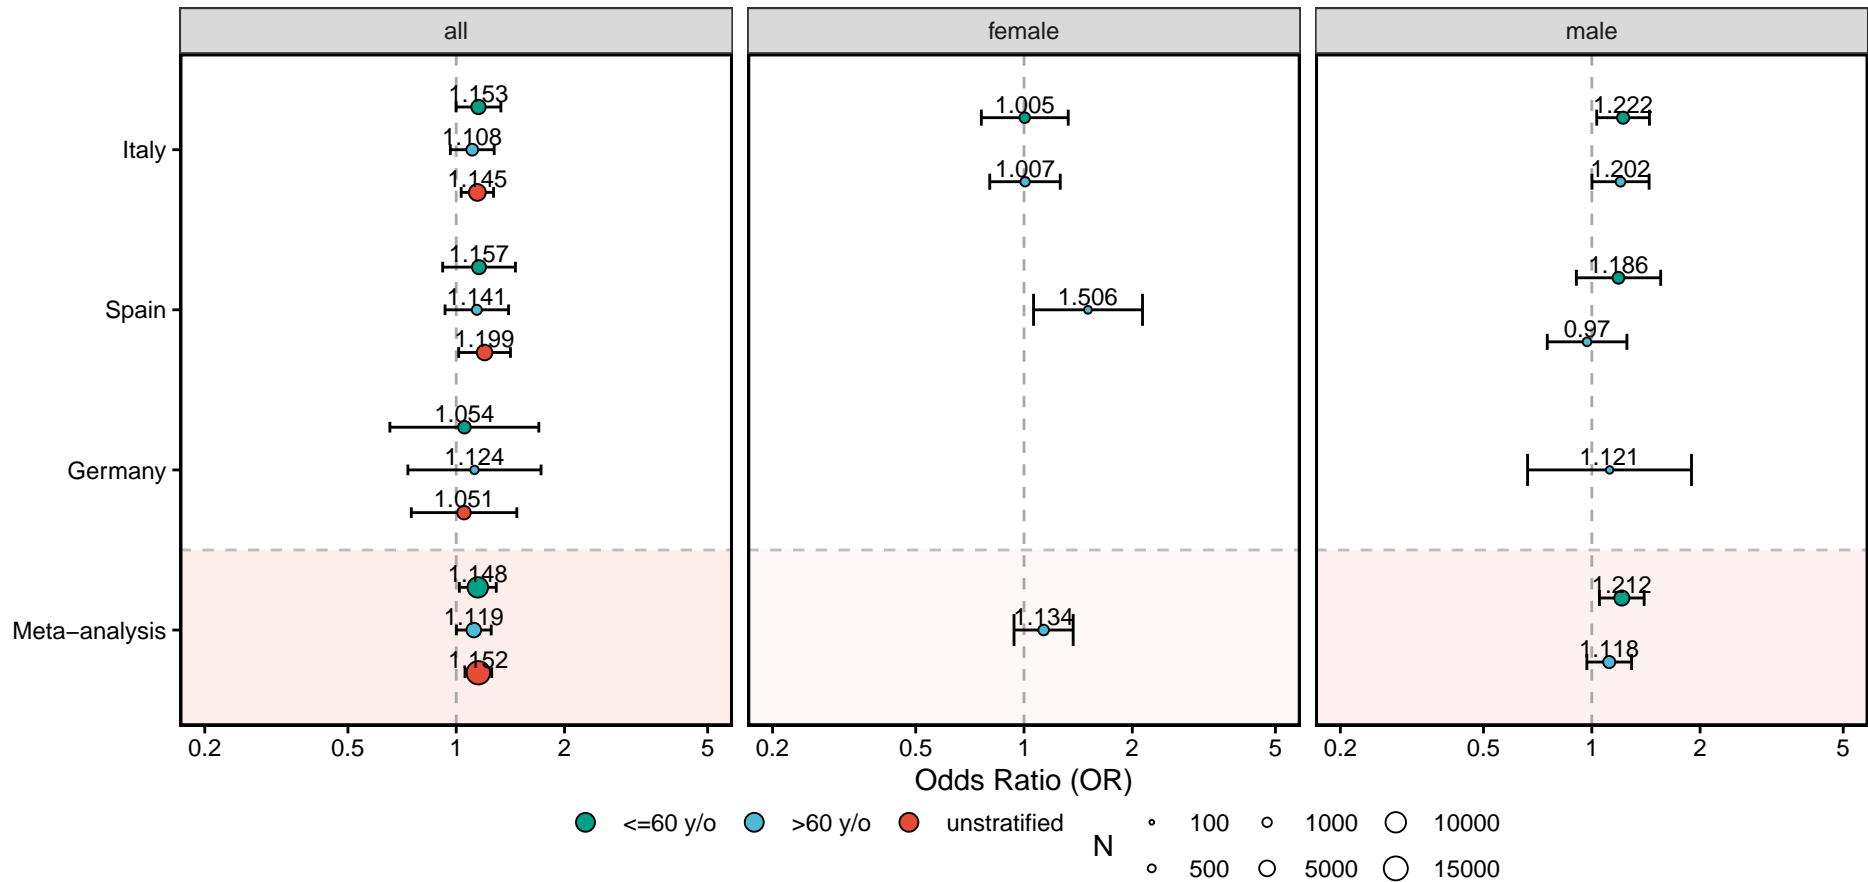

IFNAR2 chr21:33247902:C:T-(rs2834161)-C\*

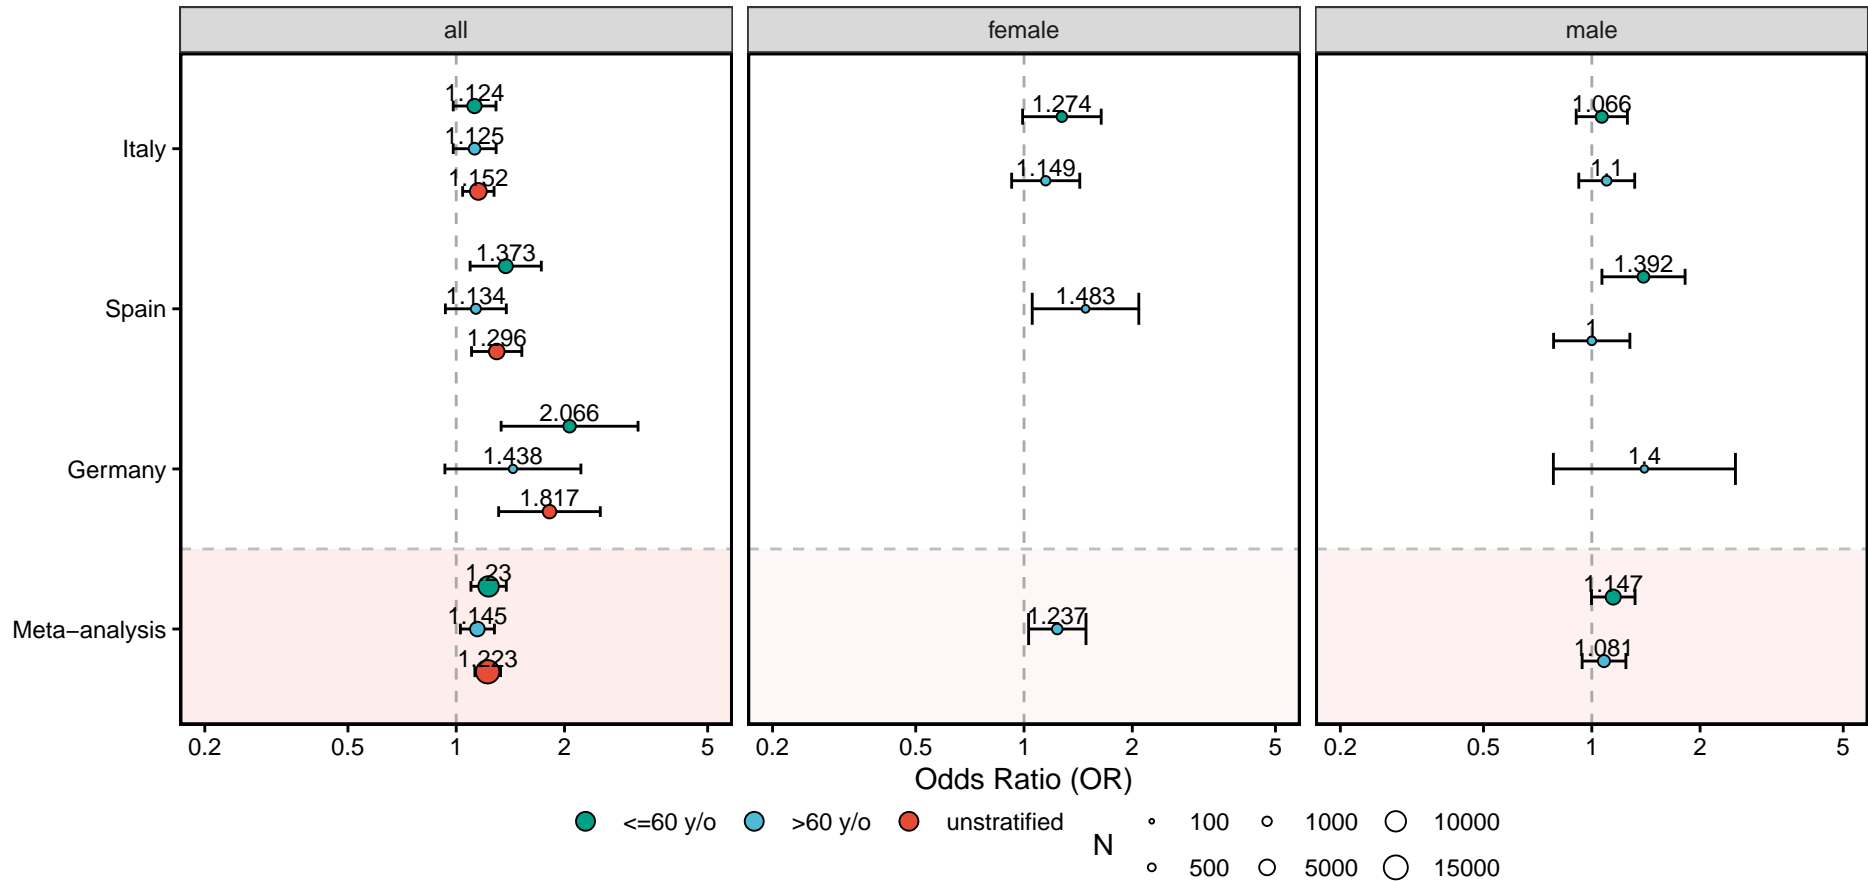

# 17q21 inversion-H2\*

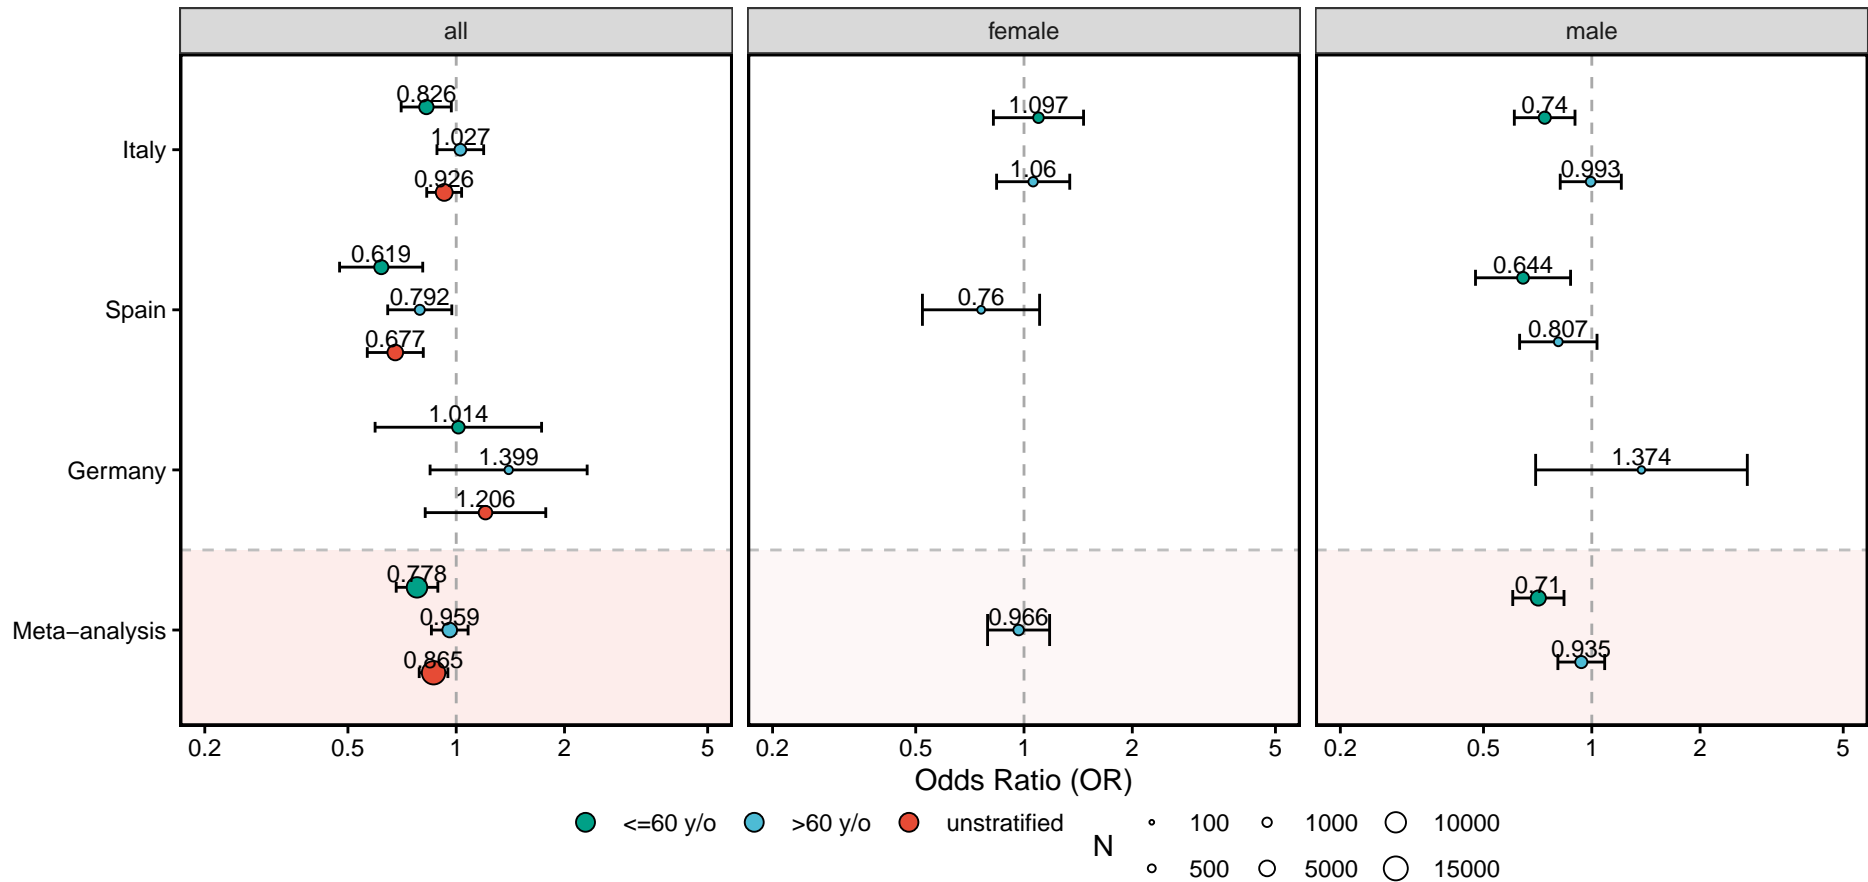

Supplement: supplementary_figure11b_ddac158.pdf [file supplementary_figure11b_ddac158.pdf]
